# Supplementary material for: MPI depletion enhances O-GlcNAcylation of p53 and suppresses the Warburg effect
Source: eLife. 2017 Jun 23;6:e22477. doi: 10.7554/eLife.22477 (PMC5495572; doi:10.7554/eLife.22477)
Supplement: Figure 2—source data 1. — Partial dataset of RNAseq analysis performed in 24 hpf zebrafish embryos injected with std or mpi MO. Log2 fold change (FC) values relative to WT + std MO. The list of showing the changes in expression of the genes involved in the N-glycosylation pathway. DOI: http://dx.doi.org/10.7554/eLife.22477.004 [file elife-22477-fig2-data1.xlsx]

## Sheet: Sheet1
Figure 2-- source data 1. Changes in expression of the genes involved in the N-glycosylation pathway
GO_term	GO	gene	chr	start	stop	AB_std_24hpf_mult	AB_mpi_24hpf_mult	log2_ab_mpi_by_std
H_GO:0006487	protein N-linked glycosylation	dpagt1	chr5	32227527	32234904	28.461	20.0325	-0.51
H_GO:0018279	protein N-linked glycosylation via asparagine	gnpnat1	chr17	15057244	15061196	16.0338	12.4258	-0.37
H_GO:0006487	protein N-linked glycosylation	alg12	chr4	26396936	26405844	32.9612	29.4352	-0.16
GO:0006487	protein N-linked glycosylation	mgat5	chr22	12082939	12201627	13.5322	14.354	0.09
GO:0018279	protein N-linked glycosylation via asparagine	syvn1	chr14	27461812	27474843	35.7475	37.2647	0.06
H_GO:0018279	protein N-linked glycosylation via asparagine	ube2j1	chr20	1201030	1215248	18.819	19.89	0.08
H_GO:0006487	protein N-linked glycosylation	man1b1	chr5	30820185	30833564	20.1576	22.2115	0.14
GO:0006487	protein N-linked glycosylation	mgat3	chr3	25338653	25369991	0.96075	3.532	1.88
H_GO:0018279	protein N-linked glycosylation via asparagine	dpm3	chr19	9156526	9159037	64.2472	68.283	0.09
H_GO:0018279	protein N-linked glycosylation via asparagine	alg9	chr5	59092912	59112290	19.747	22.7115	0.2
H_GO:0018279	protein N-linked glycosylation via asparagine	mcfd2	chr13	8048509	8056327	32.104	35.39	0.14
H_GO:0018279	protein N-linked glycosylation via asparagine	alg14	chr24	31321619	31343639	26.5682	30.4973	0.2
H_GO:0006487	protein N-linked glycosylation	alg8	chr21	22007815	22016417	15.461	21.2115	0.46
H_GO:0018279	protein N-linked glycosylation via asparagine	derl3	chr8	31769463	31777653	16.3897	22.3532	0.45
H_GO:0006487	protein N-linked glycosylation	alg6	chr6	31757239	31779273	23.5334	30.9258	0.39
GO:0006487	protein N-linked glycosylation	pmm2	chr1	8936454	8942721	67.033	78.8545	0.23
H_GO:0006487	protein N-linked glycosylation	dolpp1	chr21	4260224	4276930	35.1758	46.1396	0.39
H_GO:0006487	protein N-linked glycosylation	tusc3	chr1	14800585	14962128	10.551	18.568	0.82
GO:0018279	protein N-linked glycosylation via asparagine	vcp	chr5	43128976	43139193	518.105	576.586	0.15
H_GO:0006487	protein N-linked glycosylation	tmem165	chr20	22258457	22265305	63.7115	78.426	0.3
GO:0018279	protein N-linked glycosylation via asparagine	ddost	chr23	24514177	24521200	287.122	326.033	0.18
H_GO:0018279	protein N-linked glycosylation via asparagine	edem1	chr6	42864167	42880600	33.1395	45.1043	0.44
H_GO:0018279	protein N-linked glycosylation via asparagine	uap1	chr6	34694709	34710699	39.8543	64.3189	0.69
GO:0018279	protein N-linked glycosylation via asparagine	rpn2	chr11	15587410	15658953	422.104	547.426	0.38
H_GO:0018279	protein N-linked glycosylation via asparagine	canx	chr14	14115080	14159267	424.568	633.247	0.58
H_GO:0018279	protein N-linked glycosylation via asparagine	ostc	chr7	65684937	65692193	228.265	367.498	0.69
