# Supplementary material for: MPI depletion enhances O-GlcNAcylation of p53 and suppresses the Warburg effect
Source: eLife. 2017 Jun 23;6:e22477. doi: 10.7554/eLife.22477 (PMC5495572; doi:10.7554/eLife.22477)
Supplement: Figure 2—source data 2. — Partial dataset of RNAseq analysis performed in 24 hpf zebrafish embryos (WT and p53 null) injected with std or mpi MO. Log2 fold change (FC) values relative to WT + std MO. The list of showing the changes in expression of the genes involved in apoptosis and cell cycle arrest. DOI: http://dx.doi.org/10.7554/eLife.22477.005 [file elife-22477-fig2-data2.xlsx]

## Sheet: Sheet1
Figure 2- source data 2. Changes in expression of the genes involved in apoptosis and cell cycle arrest.
GO_term	GO	gene	chr	start	stop	AB_std_24hpf_mult	AB_mpi_24hpf_mult	p53_MT_std_24hpf_mult	p53_MT_mpi_24hpf_mult	log2_ab_mpi_by_std	log2_p53_mpi_by_std
H_GO:0006917	induction of apoptosis	irf1b	chr21	44267625	44273799	1.10325	40.7111	0.7295	2.49625	5.2	1.8
GO:0042771	intrinsic apoptotic signaling pathway in response to DNA damage by p53 class mediator	phlda3	chr23	5806284	5809039	9.99725	197.488	8.39075	5.60475	4.3	-0.6
H_GO:0007050	cell cycle arrest	gadd45aa	chr2	10071990	10075828	6.9255	118.872	7.6405	5.355	4.1	-0.5
H_GO:0006917	induction of apoptosis	foxo3b	chr20	32325759	32371643	27.5325	223.104	29.2111	28.2115	3	-0.1
GO:0071157	negative regulation of cell cycle arrest	mdm2	chr4	22061422	22070986	83.4257	570.997	46.604	38.5677	2.8	-0.3
GO:0042771	intrinsic apoptotic signaling pathway in response to DNA damage by p53 class mediator	tp53	chr5	25755130	25766755	180.176	1226.38	128.462	117.819	2.8	-0.1
GO:0007050	cell cycle arrest	sesn3	chr15	34339239	34388989	36.166	242.568	27.3897	29.3895	2.7	0.1
H_GO:0006917	induction of apoptosis	tnfrsf9a	chr23	30244754	30248603	4.17575	23.3188	3.7645	8.17575	2.5	1.1
GO:0006917	induction of apoptosis	pmaip1	chr10	8746714	8747008	14.2477	60.5333	6.7465	2.9245	2.1	-1.2
GO:0043065	positive regulation of apoptotic process	bnip4	chr17	20061941	20066459	43.6043	173.962	30.9617	24.2825	2	-0.4
H_GO:0006915	apoptotic process	phlda2	chr25	24248130	24249446	61.1223	217.247	46.7115	45.819	1.8	0
GO:0007050	cell cycle arrest	sesn2	chr19	45226189	45242401	7.53225	26.4258	6.6405	7.747	1.8	0.2
GO:0007050	cell cycle arrest	cdkn1ba	chr4	17660914	17663765	35.6758	105.032	27.1758	30.3543	1.6	0.2
GO:0043065	positive regulation of apoptotic process	baxa	chr3	37771251	37780637	78.3547	217.925	72.0148	72.8895	1.5	0
GO:0007050	cell cycle arrest	sesn1	chr20	32263264	32269197	48.9879	126.229	47.9255	41.675	1.4	-0.2
H_GO:0006915	apoptotic process	krt18	chr23	10454075	10457981	594.961	1338.96	546.962	573.569	1.2	0.1
H_GO:0007050	cell cycle arrest	cgrrf1	chr20	9957215	9961735	3.35375	6.9965	6.6405	5.53275	1.1	-0.3
GO:0006915	apoptotic process	ddit4	chr12	49633443	49635578	89.7114	186.389	54.4618	53.8897	1.1	0
H_GO:0006917	induction of apoptosis	itm2ba	chr6	9926151	9937498	185.086	334.783	191.498	243.818	0.9	0.3
H_GO:0007050	cell cycle arrest	mycb	chr2	31734124	31736250	84.4253	137.766	79.533	90.7289	0.7	0.2
H_GO:0007050	cell cycle arrest	cdk6	chr19	41210993	41284659	24.5688	39.2465	33.5506	34.8725	0.7	0.1
H_GO:0006917	induction of apoptosis	cebpb	chr8	29301344	29302915	57.4974	88.9617	46.8188	51.6765	0.6	0.1
GO:0043066	negative regulation of apoptotic process	grina	chr16	57020366	57047033	91.6582	130.283	88.7475	72.9975	0.5	-0.3
