# Supplementary material for: MPI depletion enhances O-GlcNAcylation of p53 and suppresses the Warburg effect
Source: eLife. 2017 Jun 23;6:e22477. doi: 10.7554/eLife.22477 (PMC5495572; doi:10.7554/eLife.22477)
Supplement: Figure 5—source data 1. — Partial dataset of RNA-seq analysis performed in 24 hpf zebrafish embryos injected with std or mpi MO. Log2 fold change (FC) values relative to WT + std MO. The list of showing the changes in expression of the genes involved in glycolysis. DOI: http://dx.doi.org/10.7554/eLife.22477.015 [file elife-22477-fig5-data1.xlsx]

## Sheet: Sheet1
Figure 5- source data 1. Changes in expression of the genes involved in glycolysis.
GO_term	GO	gene	chr	start	stop	AB_std_24hpf_mult	AB_mpi_24hpf_mult	log2_ab_mpi_by_std			log2_p53_mpi_by_std
GO:0006096	glycolysis	gpib	chr13	51999197	52021122	22.8178	3.87188	-2.6			1.8
GO:0006096	glycolysis	pfkmb	chr6	39670551	39695859	10.6405	1.96075	-2.4			-0.6
GO:0006096	glycolysis	pfkma	chr23	27794393	27812318	3.675	0.8185	-2.2			-0.5
GO:0006096	glycolysis	eno2	chr19	5697159	5714037	10.0678	3.532	-1.5			-0.1
GO:0006096	glycolysis	pgam2	chr21	17816759	17821770	125.461	49.603	-1.3			-0.3
GO:0006096	glycolysis	pkmb	chr25	30145696	30180070	21.9159	8.99625	-1.3			-0.1
GO:0006096	glycolysis	tpi1b	chr16	13990582	14005210	243.89	113.354	-1.1			0.1
GO:0006096	glycolysis	tpi1a	chr19	5718436	5727452	8.0685	3.87188	-1.1			1.1
GO:0006096	glycolysis	eno3	chr23	44727930	44739828	244.354	120.247	-1			-1.2
GO:0006096	glycolysis	ldha	chr25	25749730	25758145	94.9613	48.3185	-1			-0.4
GO:0006096	glycolysis	eno1a	chr23	22950660	22971998	171.962	94.9608	-0.9			0
GO:0006096	glycolysis	aldoab	chr12	4732662	4750376	886.11	506.569	-0.8			0.2
H_GO:0006096	glycolysis	pklr	chr16	57894773	57900068	91.444	54.9261	-0.7			0.2
GO:0006096	glycolysis	pkma	chr18	684360	725564	22.6038	13.6755	-0.7			0
GO:0006096	glycolysis	gck	chr8	42670749	42683183	0.39075	0.2485	-0.7			-0.2
GO:0006096	glycolysis	gapdh	chr16	19254340	19259329	996.639	651.497	-0.6			0.1
GO:0006096	glycolysis	pgam1a	chr13	31616768	31621237	69.1579	53.9975	-0.4			-0.3
GO:0006096	glycolysis	pdha1a	chr5	25700220	25713673	200.926	168.104	-0.3			0
GO:0006096	glycolysis	aldob	chr14	22107700	22116489	1214.48	1412.14	0.2			0.3
GO:0006096	glycolysis	aldoaa	chr3	39563061	39571863	580.104	680.497	0.2			0.2
GO:0006096	glycolysis	eno4	chr17	21125137	21141404	5.569	7.3185	0.4			0.1
GO:0006096	glycolysis	hk1	chr13	23113073	23148043	92.3901	127.301	0.5			0.1
GO:0006096	glycolysis	bpgm	chr25	20611053	20618625	8.3895	13.4264	0.7			-0.3
H_GO:0006096	glycolysis	gapdhs	chr16	47879717	47904926	111.711	182.443	0.7
GO:0006096	glycolysis	aldocb	chr21	38444354	38474843	38.8541	76.0325	1
GO:0006096	glycolysis	ldhbb	chr25	3382959	3392674	0.39075	0.81725	1.1
GO:0006096	glycolysis	hk2	chr5	15271330	15394064	16.6399	38.4258	1.2
GO:0006096	glycolysis	hkdc1	chr13	23157679	23172080	11.3895	29.2473	1.4
