# Supplementary material for: MPI depletion enhances O-GlcNAcylation of p53 and suppresses the Warburg effect
Source: eLife journal article supplement (doi:10.7554/elife.22477), 2017-06-23

**Figure 5—figure supplement 1.**  
**Loss of MPI leads to decrease cell viability in embryonic and cancer cells.**

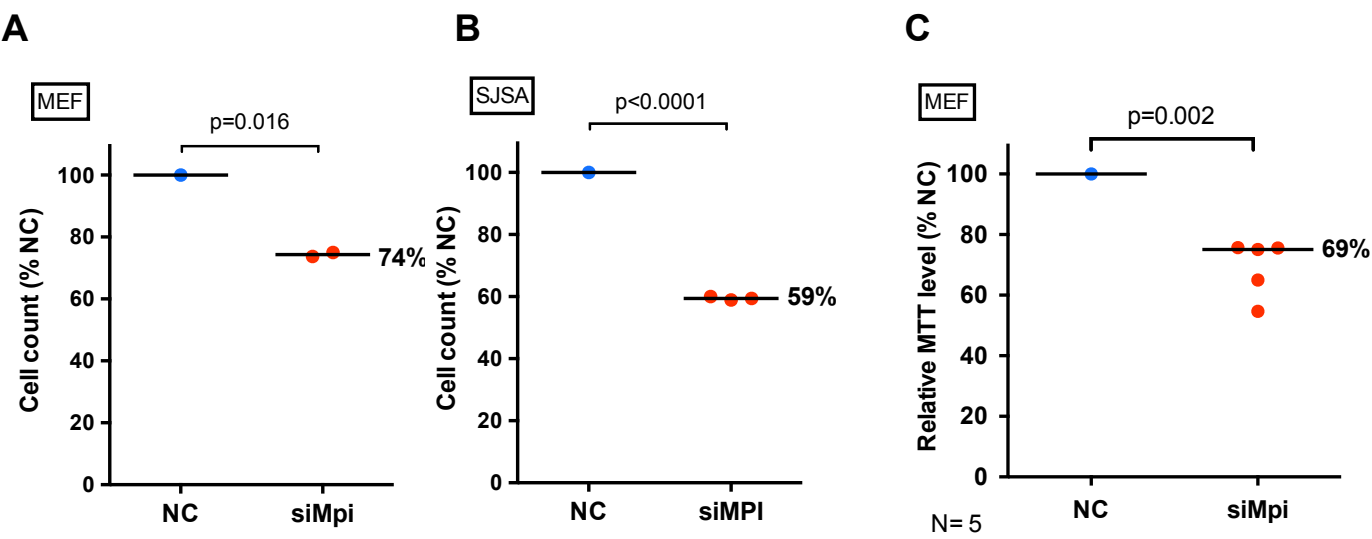

Supplement: supp [file elife_poa_e22477_Figure_5_figure_supplement_1.pdf › elife_poa_e22477_Figure_5_figure_supplement_1.pdf]
