# Supplementary material for: MPI depletion enhances O-GlcNAcylation of p53 and suppresses the Warburg effect
Source: eLife. 2017 Jun 23;6:e22477. doi: 10.7554/eLife.22477 (PMC5495572; doi:10.7554/eLife.22477)
Supplement: Supplementary file 1. — DOI: http://dx.doi.org/10.7554/eLife.22477.020 [file elife-22477-supp1.xlsx]

## Sheet: Sheet1
Supplementary file 1. Sequences of the qPCR primers and dsiRNA, shRNA duplexes.
Gene	Species	Accession	Sequence
Mpi	mouse	NM_025837	Forward: 5'-GGCAACTGGGATGGCGAGTC-3'
			Reverse: 5'-GTGCTGTGGCATCATCTCCAATCAG-3'
P53	mouse	AB017816	Forward: 5'-GGCAACTGGGATGGCGAGTC-3'
			Reverse: 5'-GTGCTGTGGCATCATCTCCAATCAG-3'
Pfkm	mouse	NM_001163487	Forward: 5'-GGTTTGGAAGCCTCTCCTCC-3'
			Reverse: 5'-GGGTCATGATCCACTCTTGTAGT-3'
Ldha	mouse	NM_010699	Forward: 5'-GAGCTTCCATTTAAGGCCCC-3'
			Reverse: 5'-GAATCTTTTGAGACCGCTAGTGC-3'
MPI	human	NM_001289157	Forward: 5'-GCATCTCACAGAAGACCCTAAG-3'
			Reverse: 5'-AGAGCACTTTGAAGAGGAAGG-3'
p53	human	AB082923	Forward: 5'-AGGCCTTGGAACTCAAGGAT-3'
			Reverse: 5'-TGAGTCAGGCCCTTCTGTCTt-3'
PFKm	human	M26066	Forward: 5'-GGCGGAGGAGAGCTAAGACTA-3'
			Reverse: 5'-AGCATTCATACCTTGGGCATCT-3'
PKM1	human	NM_002654	Forward: 5'-ACCGCAAGCTGTTTGAAGAA-3'
			Reverse: 5'-TCCATGAGGTCTGTGGAGTG-3'
PKM2	human	NM_182470	Forward: 5'-GAGGCCTCCTTCAAGTGCT-3'
			Reverse: 5'-CCAGACTTGGTGAGGACGAT-3'
LDHA	human	NM_005566	Forward: 5'-CATGGCCTGTGCCATCAGTA-3'
			Reverse: 5'-AGATATCCACTTTGCCAGAGACA-3'
mpi	zebrafish	NM_001033110	Forward: 5'-GAAGAAGCCGCAGGTAAAGA-3'
			Reverse: 5'-ACGATGCGGTTGAGGAAATAA-3'
p53	zebrafish	NM_001271820	Forward: 5'-GCTCTTGCTGGGACATCATT-3'
			Reverse: 5'-AGTGGATGTTGGTGGGAGAG-3'
p21	zebrafish	NM_001002717.1	Forward: 5'- CTCTCAGTCATGACAGCTCAGAGG -3'
			Reverse: 5'-GTGAGAACTTACTGGCAGCTTCAT -3'
baxa	zebrafish	NM_131562.2	Forward: 5'-GGAGATGAGCTGGATGGAAA -3'
			Reverse: 5'-GAAAAGCGCCACAACTCTTC -3'
MPI-dsiRNA	mouse
dsiMPI1		MMC.RNAI.N025837.12.2-S1	ACAAUAUGGAGGACAUUUAUGGGAA
		MMC.RNAI.N025837.12.2-A1	UUCCCAUAAAUGUCCUCCAUAUUGUUU
dsiMPI2		MMC.RNAI.N025837.12.3-S1	AGCUCCGUCAAAGUAAUUAAAGATC
		MMC.RNAI.N025837.12.3-A1	GAUCUUUAAUUACUUUGACGGAGCUAG
MPI-dsiRNA	human
dsiMPI		HSC.RNAI.N002435.12.6-S1	GGGUUCCAACAGCGAAGUGGCGCGG
		HSC.RNAI.N002435.12.6-A1	CCGCGCCACUUCGCUGUUGGAACCCAU
Mpi-	mouse
shRNA
shMpi 2480		TRCN0000252480	AGATCCTTGACAACCGTATTT
shMpi 2478		TRCN0000252478	AGTAAATTTGGCATTAGTAAC
