# Supplementary figures and images for: MPI depletion enhances O-GlcNAcylation of p53 and suppresses the Warburg effect
Source: eLife journal article supplement (doi:10.7554/elife.22477), 2017-06-23

Figure 2—figure supplement 1.  
Mpi-depleted zebrafish embryos show few changes in N-glycosylation.

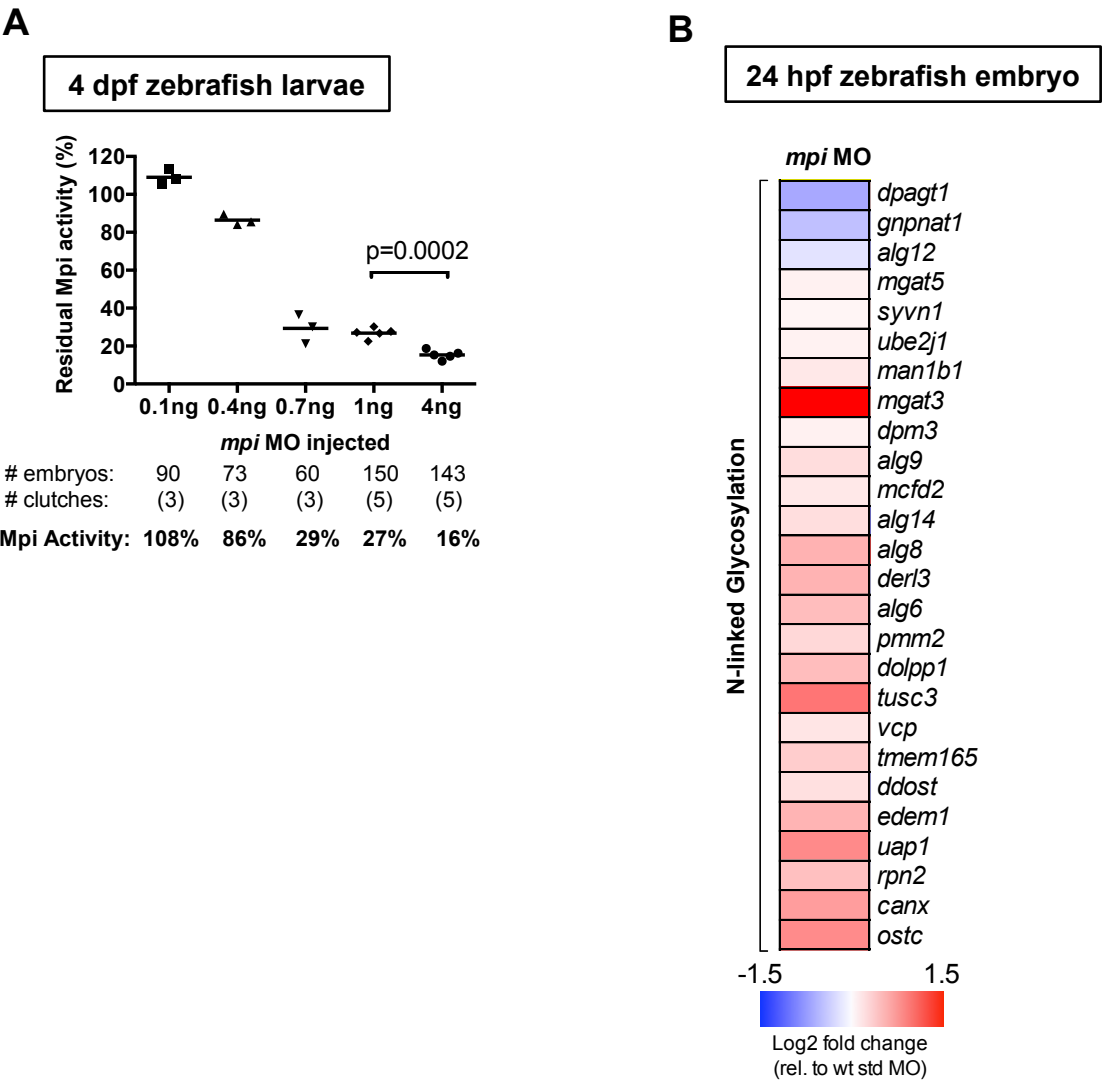

Supplement: supp [file elife_poa_e22477_Figure_2_figure_supplement_1.pdf › elife_poa_e22477_Figure_2_figure_supplement_1.pdf]

**Figure 2—figure supplement 2.**  
**p53 and its targets are increased in Mpi-depleted zebrafish embryos.**

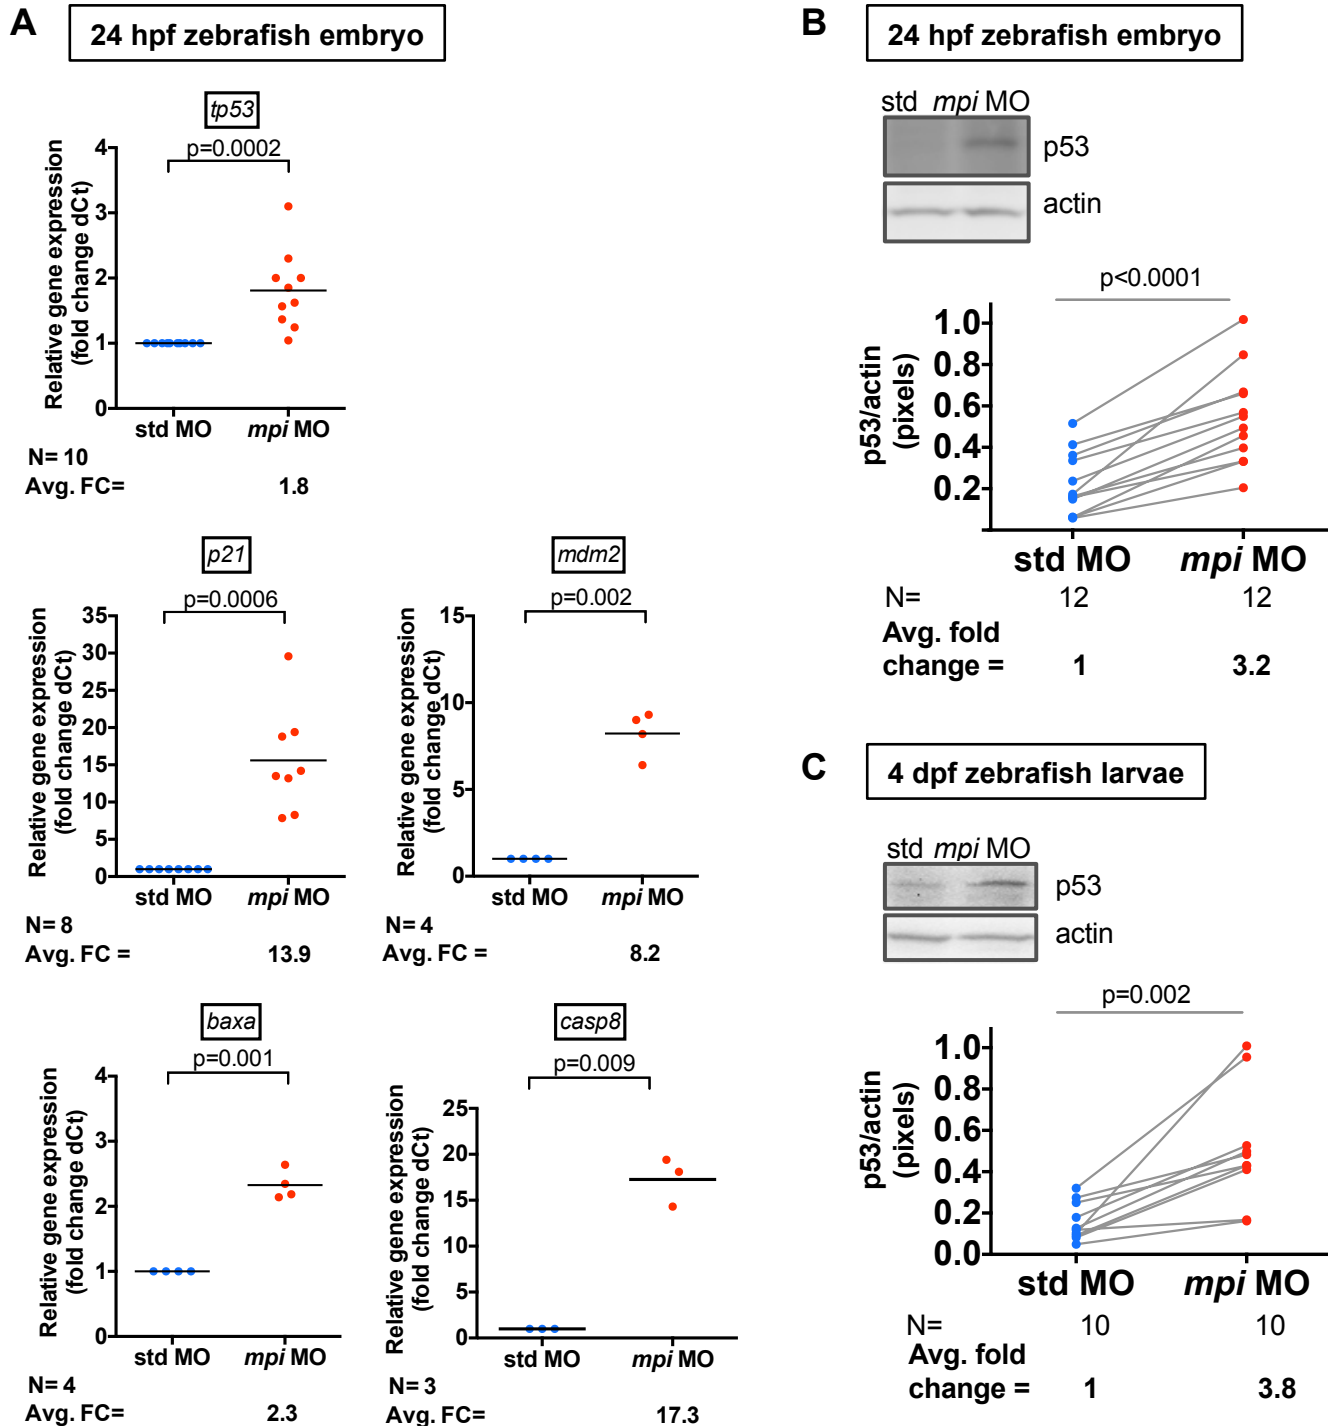

Supplement: supp [file elife_poa_e22477_Figure_2_figure_supplement_2.pdf › elife_poa_e22477_Figure_2_figure_supplement_2.pdf]

**Figure 2—figure supplement 3.**  
***mpi*<sup>mss7</sup> MT are embryonic lethal.**

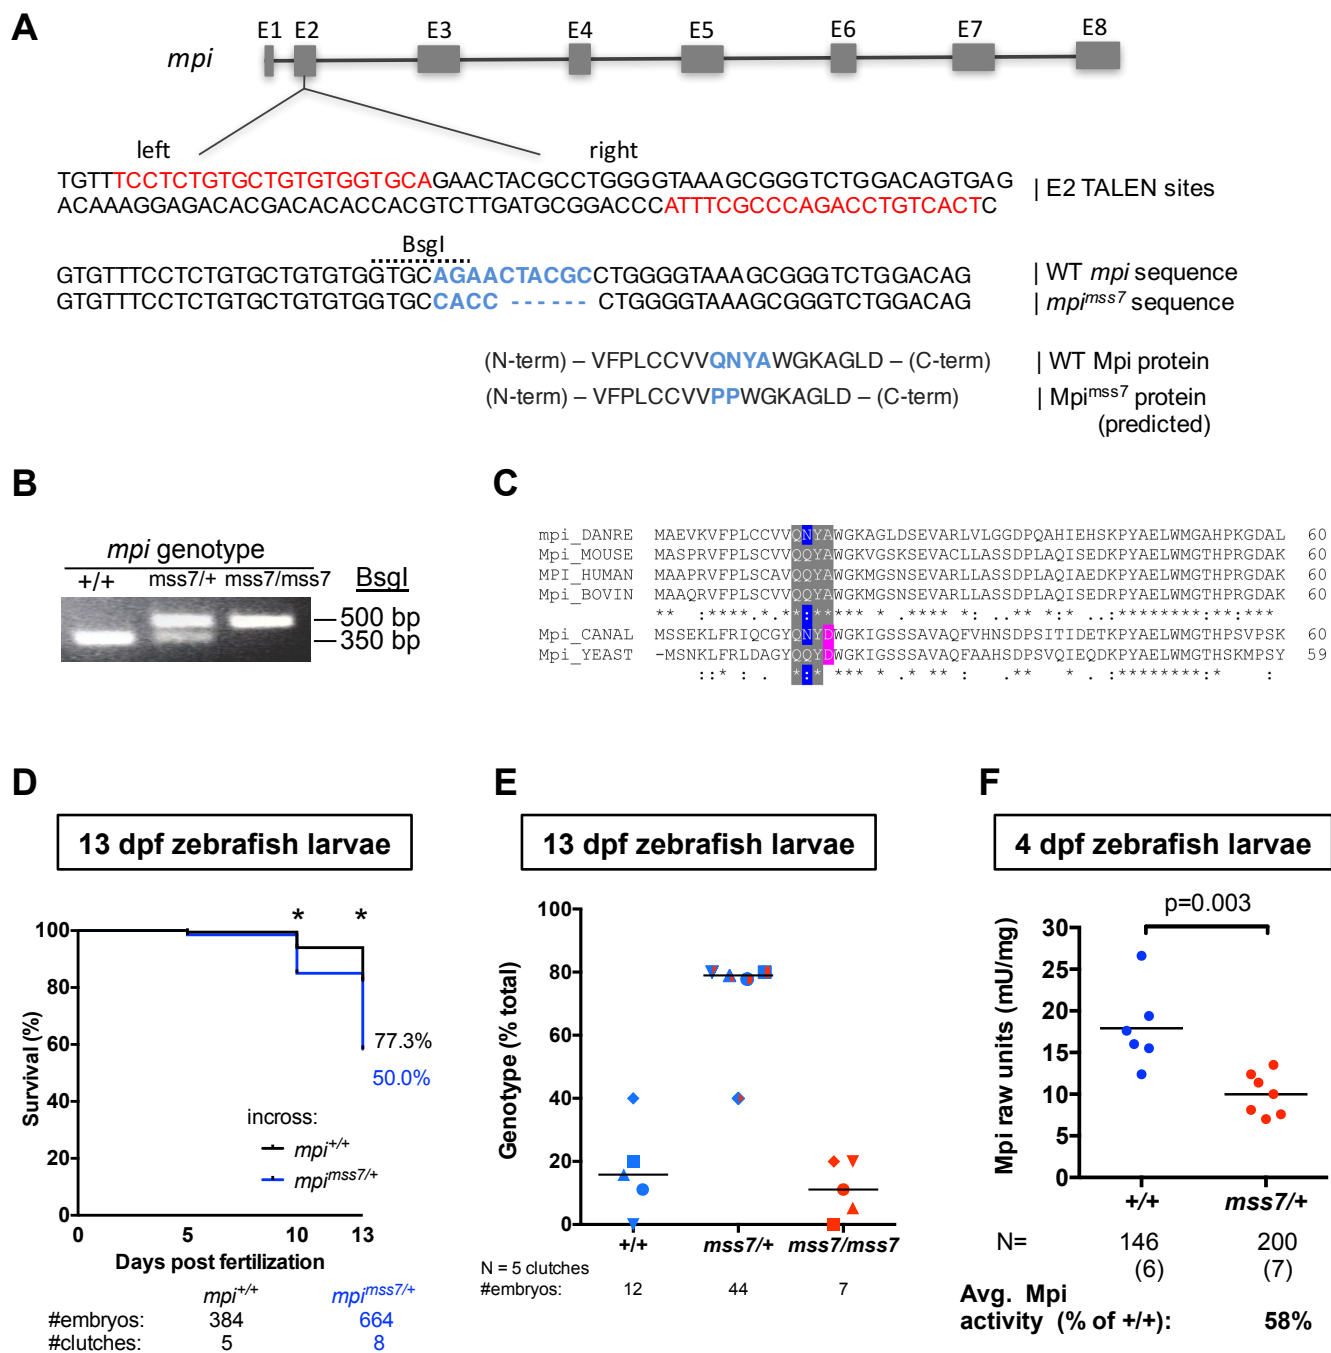

Supplement: supp [file elife_poa_e22477_Figure_2_figure_supplement_3.pdf › elife_poa_e22477_Figure_2_figure_supplement_3.pdf]

**Figure 3—figure supplement 1.**  
**Cell death from loss of Mpi is rescued with p53 depletion.**

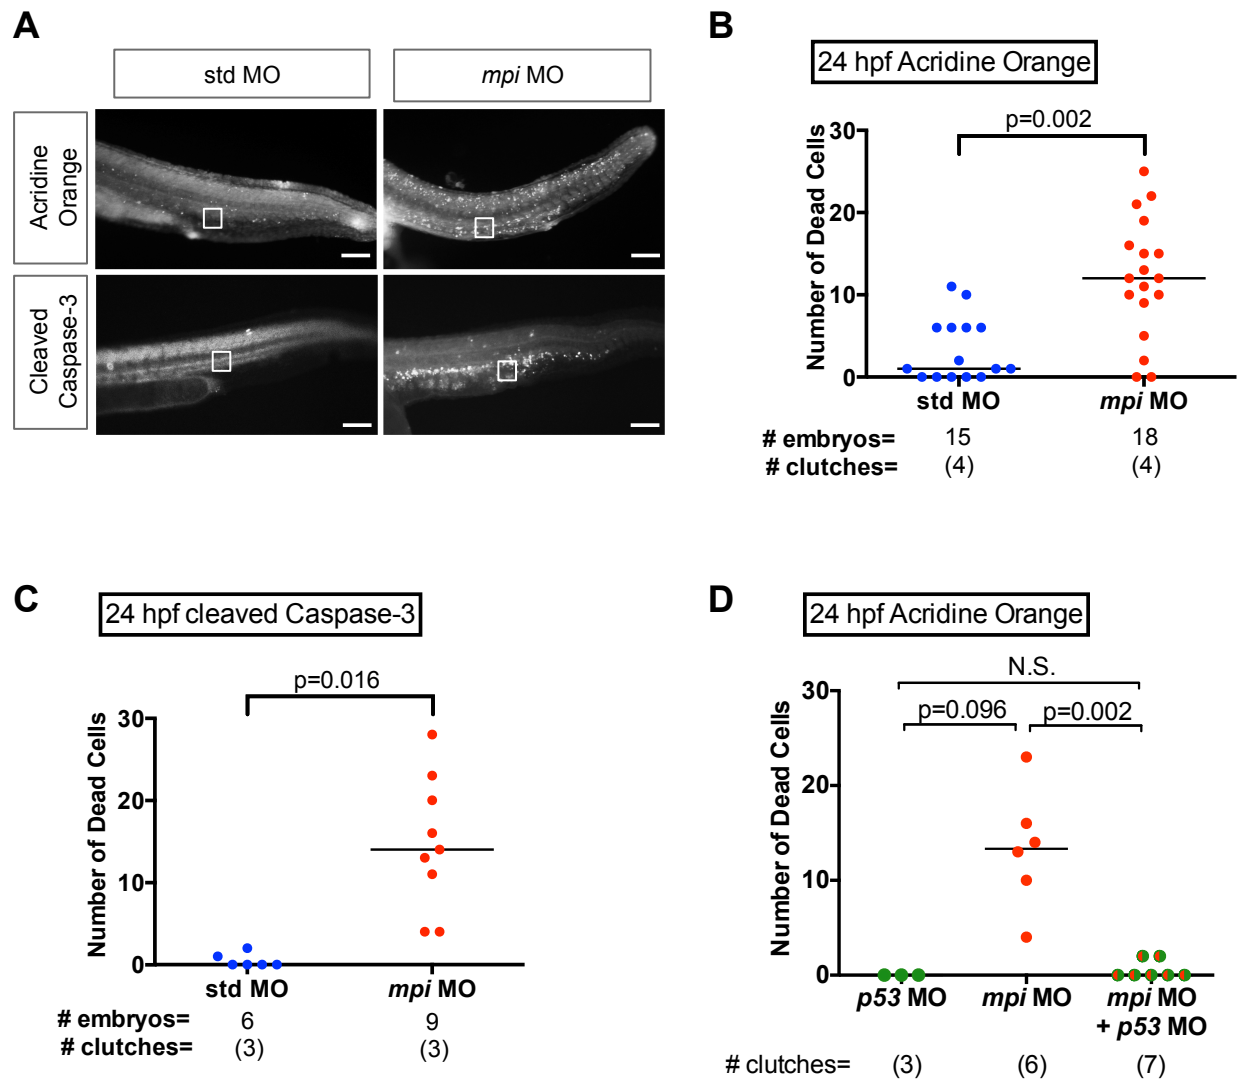

Supplement: supp [file elife_poa_e22477_Figure_3_figure_supplement_1.pdf › elife_poa_e22477_Figure_3_figure_supplement_1.pdf]

**Figure 3—figure supplement 2.**  
**Tm-induced hypoglycosylation does not depend on p53.**

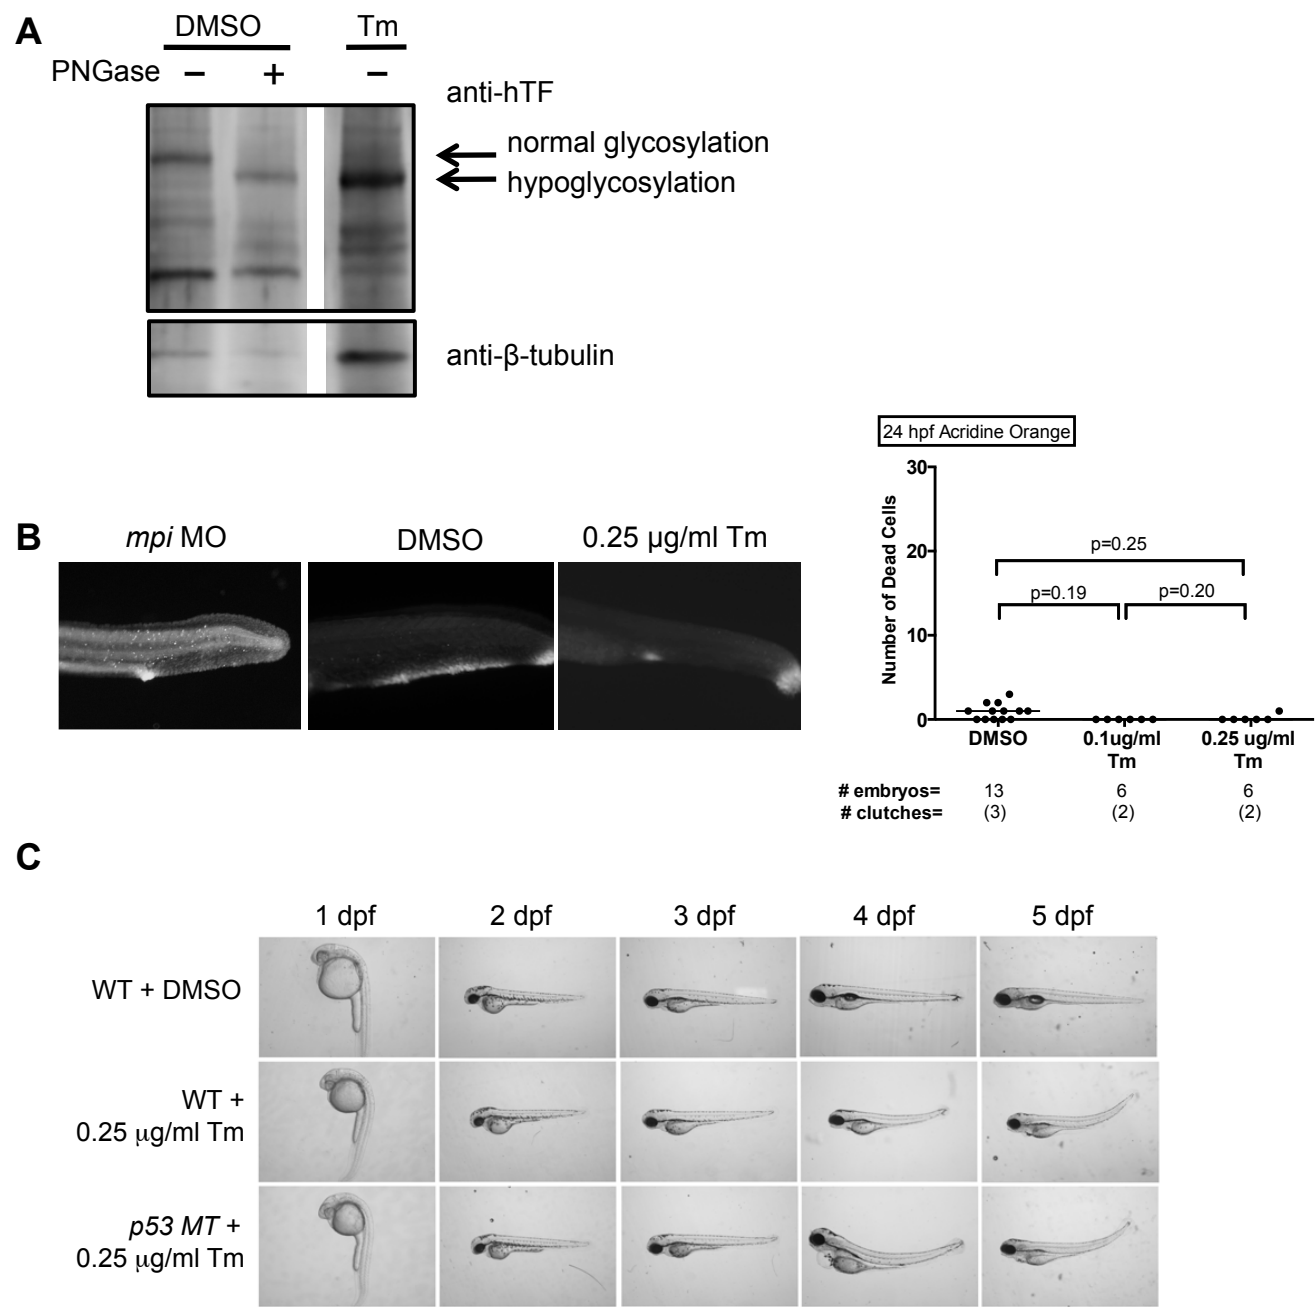

Supplement: supp [file elife_poa_e22477_Figure_3_figure_supplement_2.pdf › elife_poa_e22477_Figure_3_figure_supplement_2.pdf]

**Figure 4—figure supplement 1.**  
**MPI can be efficiently depleted in mammalian cell lines.**

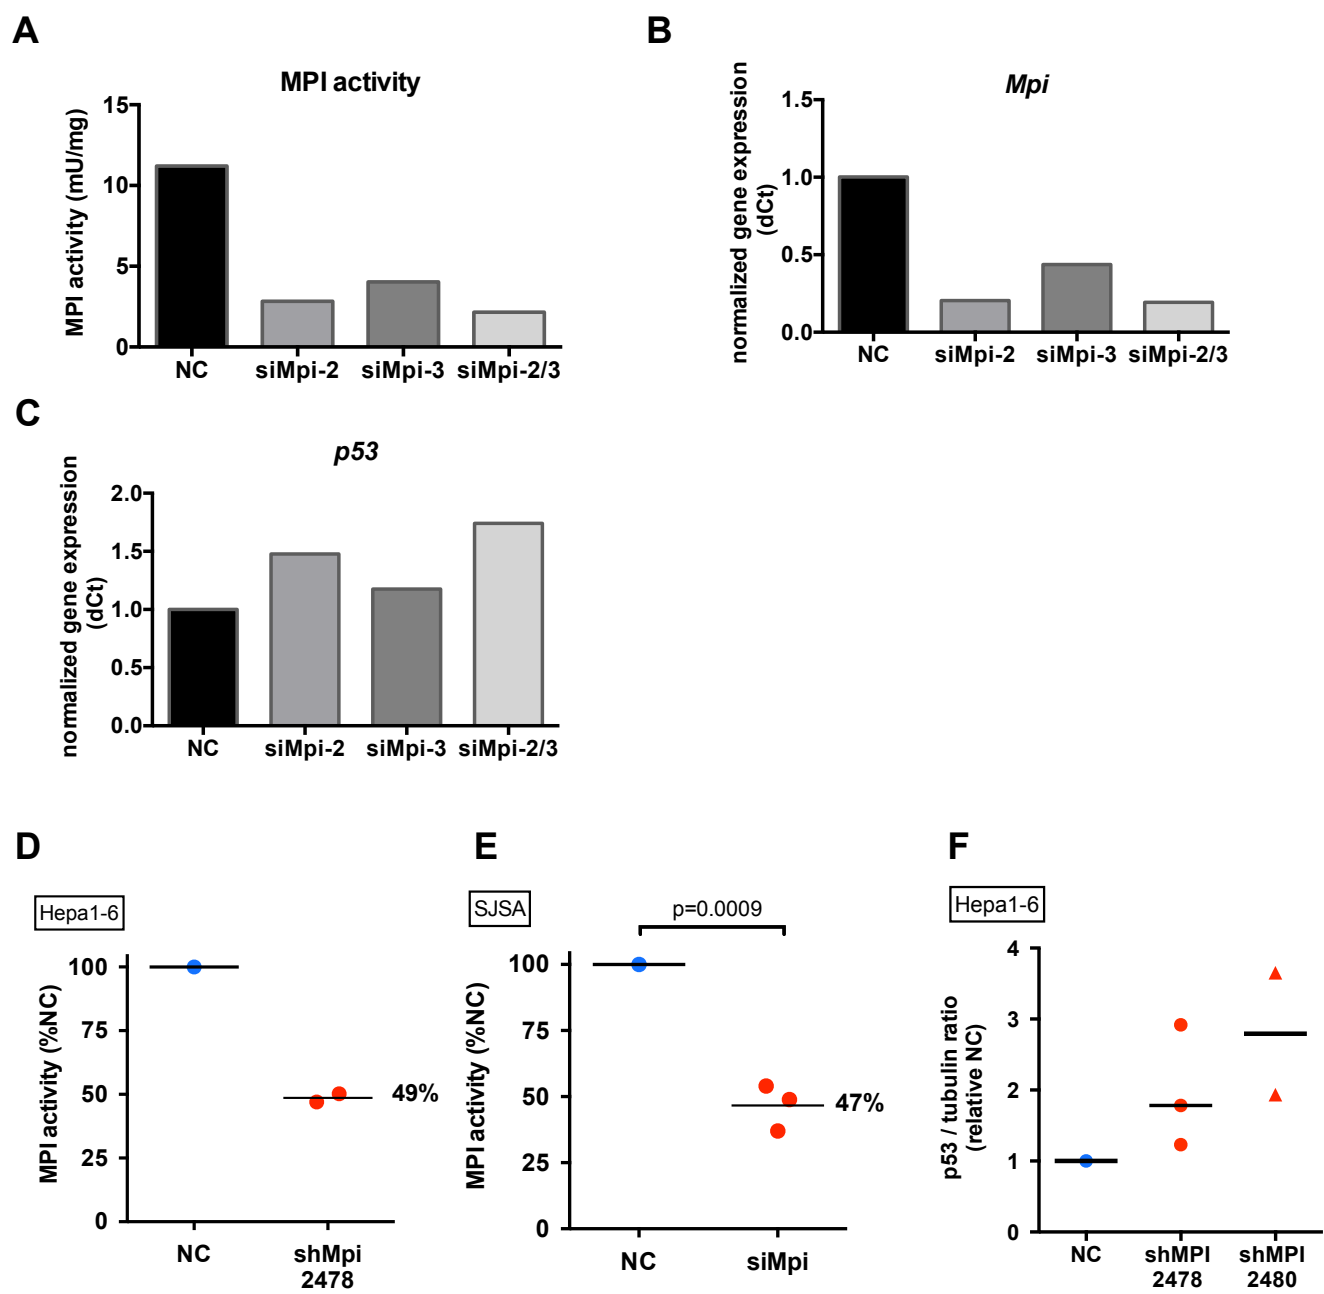

Supplement: supp [file elife_poa_e22477_Figure_4_figure_supplement_1.pdf › elife_poa_e22477_Figure_4_figure_supplement_1.pdf]

**Figure 5—figure supplement 2.**  
**Loss of MPI leads to inhibition of glycolysis in HCT116 cancer cells.**

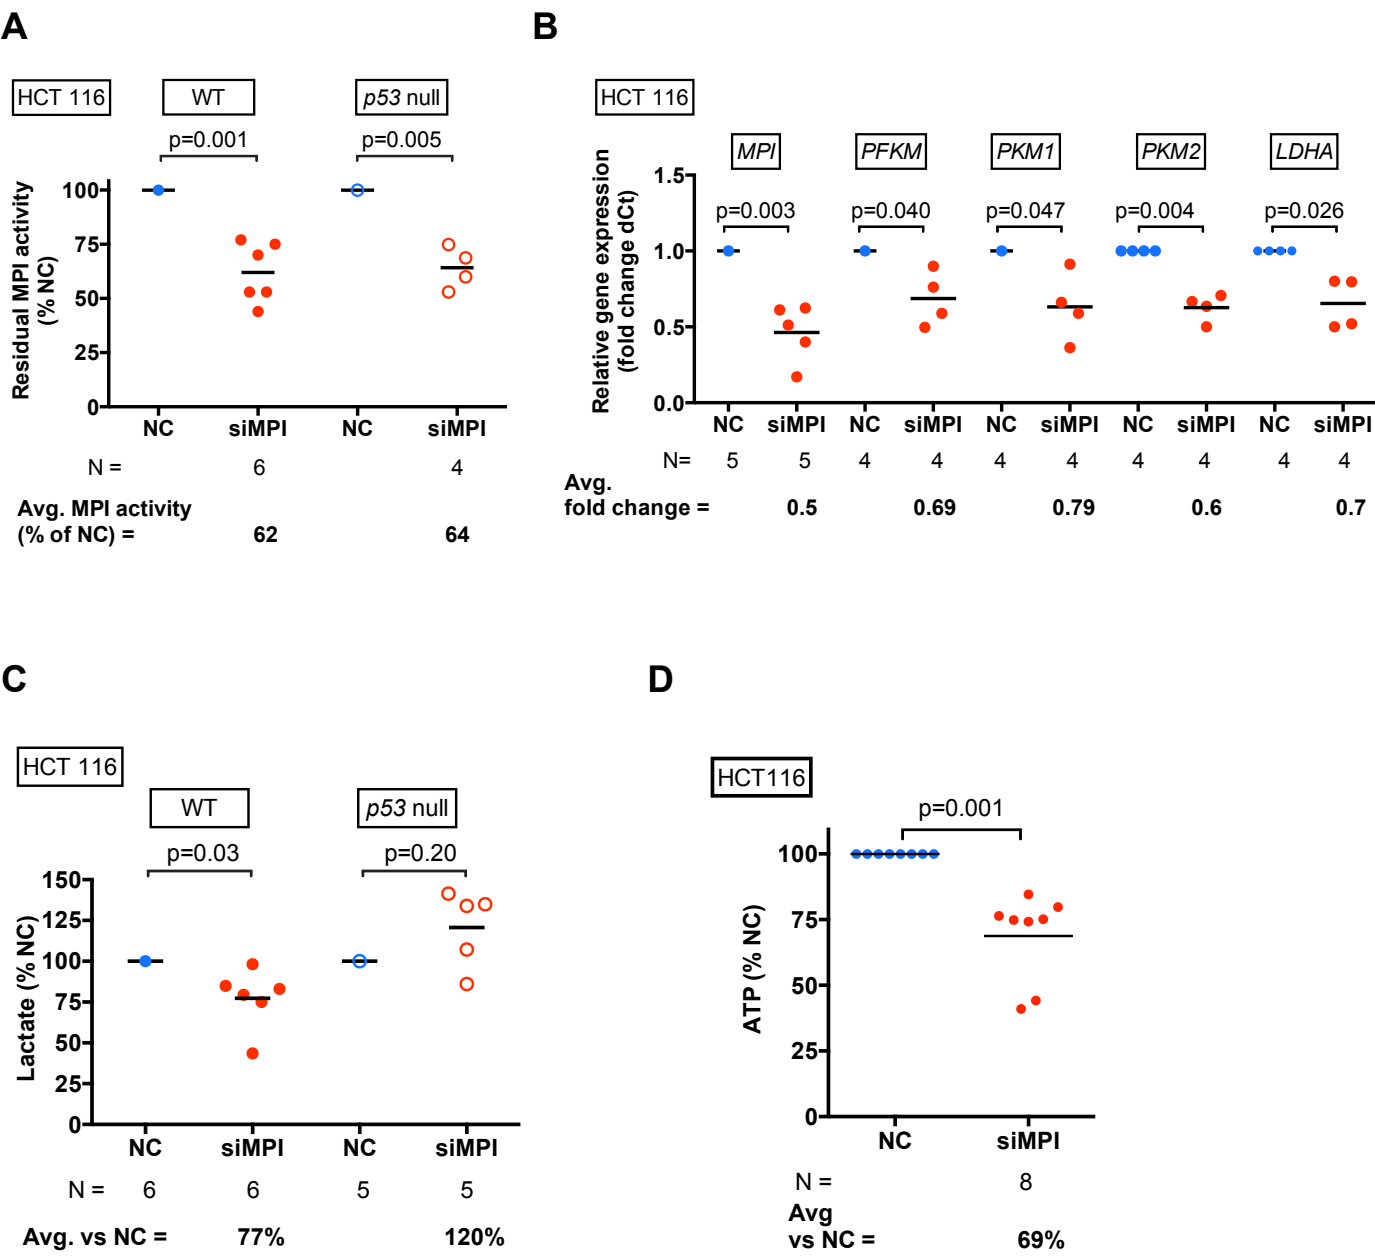

Supplement: supp [file elife_poa_e22477_Figure_5_figure_supplement_2.pdf › elife_poa_e22477_Figure_5_figure_supplement_2.pdf]
